# Supplementary material
Source: PubMed Central journal article supplement (PMC1458998)
Supplement: pnas_0510638103_1.pdf [file pnas_0510638103_1.pdf]

## Supporting Text

**Estimates of Selection and Dominance Parameters.** We investigated the influence of dominance relationships ( $h$ ) on estimates of selection intensity based on the ratio ( $r$ ) of U-to-P polymorphic derived mutations ( $\gamma_r$ ) and on the difference in frequency ( $\Delta f$ ) between P and U mutations ( $\gamma_{\Delta f}$ ). Our results (see Fig. 6) are based on the analytical predictions under the infinitely many sites model and mutation-selection-drift (MSD) equilibrium (1-4). We observe that variation in  $h$ , including complete dominance ( $h \approx 1$ ) or recessivity ( $h \approx 0$ ), has a minor effect on  $r$  and hence on estimates of  $\gamma_r$  for moderately large sample sizes. [The influence of variable  $h$  on  $r$  increases with sample size, and it is negligible when the sample size is small (data not shown).] In contrast, different dominance relations strongly influence  $\Delta f$ , biasing our estimates of  $\gamma_{\Delta f}$  if genic selection is assumed; the more recessive an advantageous mutation (i.e., P mutation), the weaker the effect of  $\gamma$  on  $\Delta f$ . That is, the common assumption of genic selection ( $h \approx 0.5$ ) will overestimate (or underestimate) the true  $\gamma_{\Delta f}$  if P mutations are partially dominant (or recessive).

**Frequency of Favored Codons, Mutational Biases, and Dominance.** Assuming the infinitely many sites model and MSD equilibrium, the fraction of favored codons in a sequence ( $P$ ) can be estimated as a function of  $\gamma$  and mutations rates, where  $u_1$  and  $u_2$  are mutation rates at favored and nonfavored sites that will generate nonfavored and favored sites, respectively,

$$P = \frac{e^{2\gamma}}{w + e^{2\gamma}},$$

with  $w = u_1/u_2$  (1, 5, 6).  $w$  is an index of the mutational bias, and  $w > 1$  indicates mutational bias toward AT content. Note that this formula to estimate  $P$  is valid for any

---

dominance parameter (unpublished data), and therefore the study of the change in  $P$  ( $\Delta P$ ) due to variation in  $w$  is also valid for any dominance parameter.

**Nonstationarity Caused by Changes in BGC and/or  $w$ .** To study the possible causes of nonstationarity at synonymous sites in the human lineage, we investigated two neutral mechanisms expected to increase the number of fixed AT and U mutations, relative to GC and P mutations, and their effects across isochores. The first mechanism is associated with a genome-wide increase in the mutation rate toward AT ( $w$ ); the second is a consequence of a genome-wide reduction in the effects of bias mismatch repair during gene-conversion events (BGC) (7), hence causing a relative increase in AT content. We investigated the analytical predictions under the infinitely many sites model and MSD equilibrium (2, 4-6) (Fig. 8). We observe that an increase in  $w$  will generate a pattern that is close to that observed, with a maximum relative reduction in GC content in genes located in isochores with intermediate GC content. In contrast, we observe that the neutral scenario caused by a reduction in the effects of BGC generates a pattern with stronger effects in genes located in GC-rich isochores.

1. Li, W. H. (1987) *J. Mol. Evol.* **24**, 337-345.
2. Wright, S. (1931) *Genetics* **16**, 97-159.
3. Kimura, M. (1964) *J. Appl. Probab.* **1**, 177-232.
4. Crow, J. F. & Kimura, K. (1970) *An Introduction to Population Genetics Theory* (Harper & Row, New York).
5. Bulmer, M. (1991) *Genetics* **129**, 897-907.
6. McVean, G. A. & Charlesworth, B. (1999) *Genet. Res.* **74**, 145-158.
7. Duret, L. (2002) *Curr. Opin. Genet. Dev.* **12**, 640-649.
8. Comeron, J. M. (2004) *Genetics* **167**, 1293-1304.
9. Williamson, S., Fledel-Alon, A. & Bustamante, C. D. (2004) *Genetics* **168**, 463-475.
