# Supplementary material
Source: PubMed Central journal article supplement (PMC1458998)
Supplement: pnas_0510638103_2.pdf [file pnas_0510638103_2.pdf]

**Table 1. Probability of obtaining the observed difference in frequency ( $f$ ) and Fay and Wu's  $H$  statistic when comparing P and U mutations**

| Demographic conditions       | Recombination | $P(\Delta f \geq 0.122)$ | $P(\Delta H \geq 0.281)$ |
|------------------------------|---------------|--------------------------|--------------------------|
| Constant population size     | 0             | 0.0012                   | 0.0002                   |
|                              | 1 cM          | 0.0007                   | <0.0001                  |
|                              | 10 cM         | 0.0006                   | <0.0001                  |
|                              | Unlinked      | <0.0001                  | <0.0001                  |
| Growth <sup>‡</sup>          | 0             | <0.0001                  | <0.0001                  |
| Severe growth                | 0             | <0.0001                  | <0.0001                  |
| Bottleneck and growth        | 0             | <0.0001                  | <0.0001                  |
| Bottleneck and severe growth | 0             | <0.0001                  | <0.0001                  |

Probabilities were obtained by coalescent simulations under the neutral model (see *Materials and Methods*).

\*Total rate of cross-over per generation between the most distant polymorphisms, expressed in cM and assuming ancestral population size of 10,000.

<sup>†</sup>Simulations assuming unlinked genes and complete linkage within genes.

<sup>‡</sup>Demographic conditions are detailed in *Materials and Methods*.
