# Supplementary material
Source: PubMed Central journal article supplement (PMC1458998)
Supplement: pnas_0510638103_3.pdf [file pnas_0510638103_3.pdf]

**Table 2. Analysis of synonymous mutations in the human lineage**

|                | Genes | P     | U     | N     | Test equilibrium,       |       |       | Test equilibrium, |                         |
|----------------|-------|-------|-------|-------|-------------------------|-------|-------|-------------------|-------------------------|
|                |       |       |       |       | P vs. U*                | GC    | AT    | GC=/AT=           | GC vs. AT*              |
| Overall        | 7,645 | 2,153 | 3,119 | 1,290 | $P < 1 \times 10^{-10}$ | 2,640 | 3,369 | 553               | $P < 1 \times 10^{-10}$ |
| L1 (36.27% GC) | 661   | 229   | 253   | 129   | n.s.                    | 283   | 274   | 54                | n.s.                    |
| L2 (40.05% GC) | 2,422 | 626   | 851   | 391   | $P = 2 \times 10^{-9}$  | 762   | 948   | 158               | $P = 3 \times 10^{-6}$  |
| H1 (44.81% GC) | 1,963 | 481   | 801   | 328   | $P < 1 \times 10^{-10}$ | 613   | 857   | 140               | $P = 1 \times 10^{-10}$ |
| H2 (49.97% GC) | 1,675 | 474   | 744   | 264   | $P < 1 \times 10^{-10}$ | 563   | 795   | 124               | $P = 1 \times 10^{-10}$ |
| H3 (55.07% GC) | 924   | 343   | 470   | 178   | $P = 3 \times 10^{-6}$  | 419   | 495   | 77                | $P = 0.005$             |

Mutations are assigned to the human lineage using chimpanzee and mouse orthologous sequences. Only codons with a single synonymous mutation among the human-chimpanzee-mouse comparison were used in the study. CpG dinucleotides were not used in the analyses. P, U, and N mutations define changes according to the set of favored and disfavored codons in highly expressed genes (1): P, changes from a disfavored to a favored codon; U, changes from a favored to a disfavored codon; N, changes between two disfavored codons. GC, AT, and GC=/AT= mutations correspond to AT-to-GC changes, GC-to-AT changes, and to changes between G and C or between A and T, respectively. n.s., not significant.

\*Probability based on binomial distribution.

1. Comeron, J. M. (2004) *Genetics* **167**, 1293–1304.
