# Supplementary material
Source: PubMed Central journal article supplement (PMC1458998)

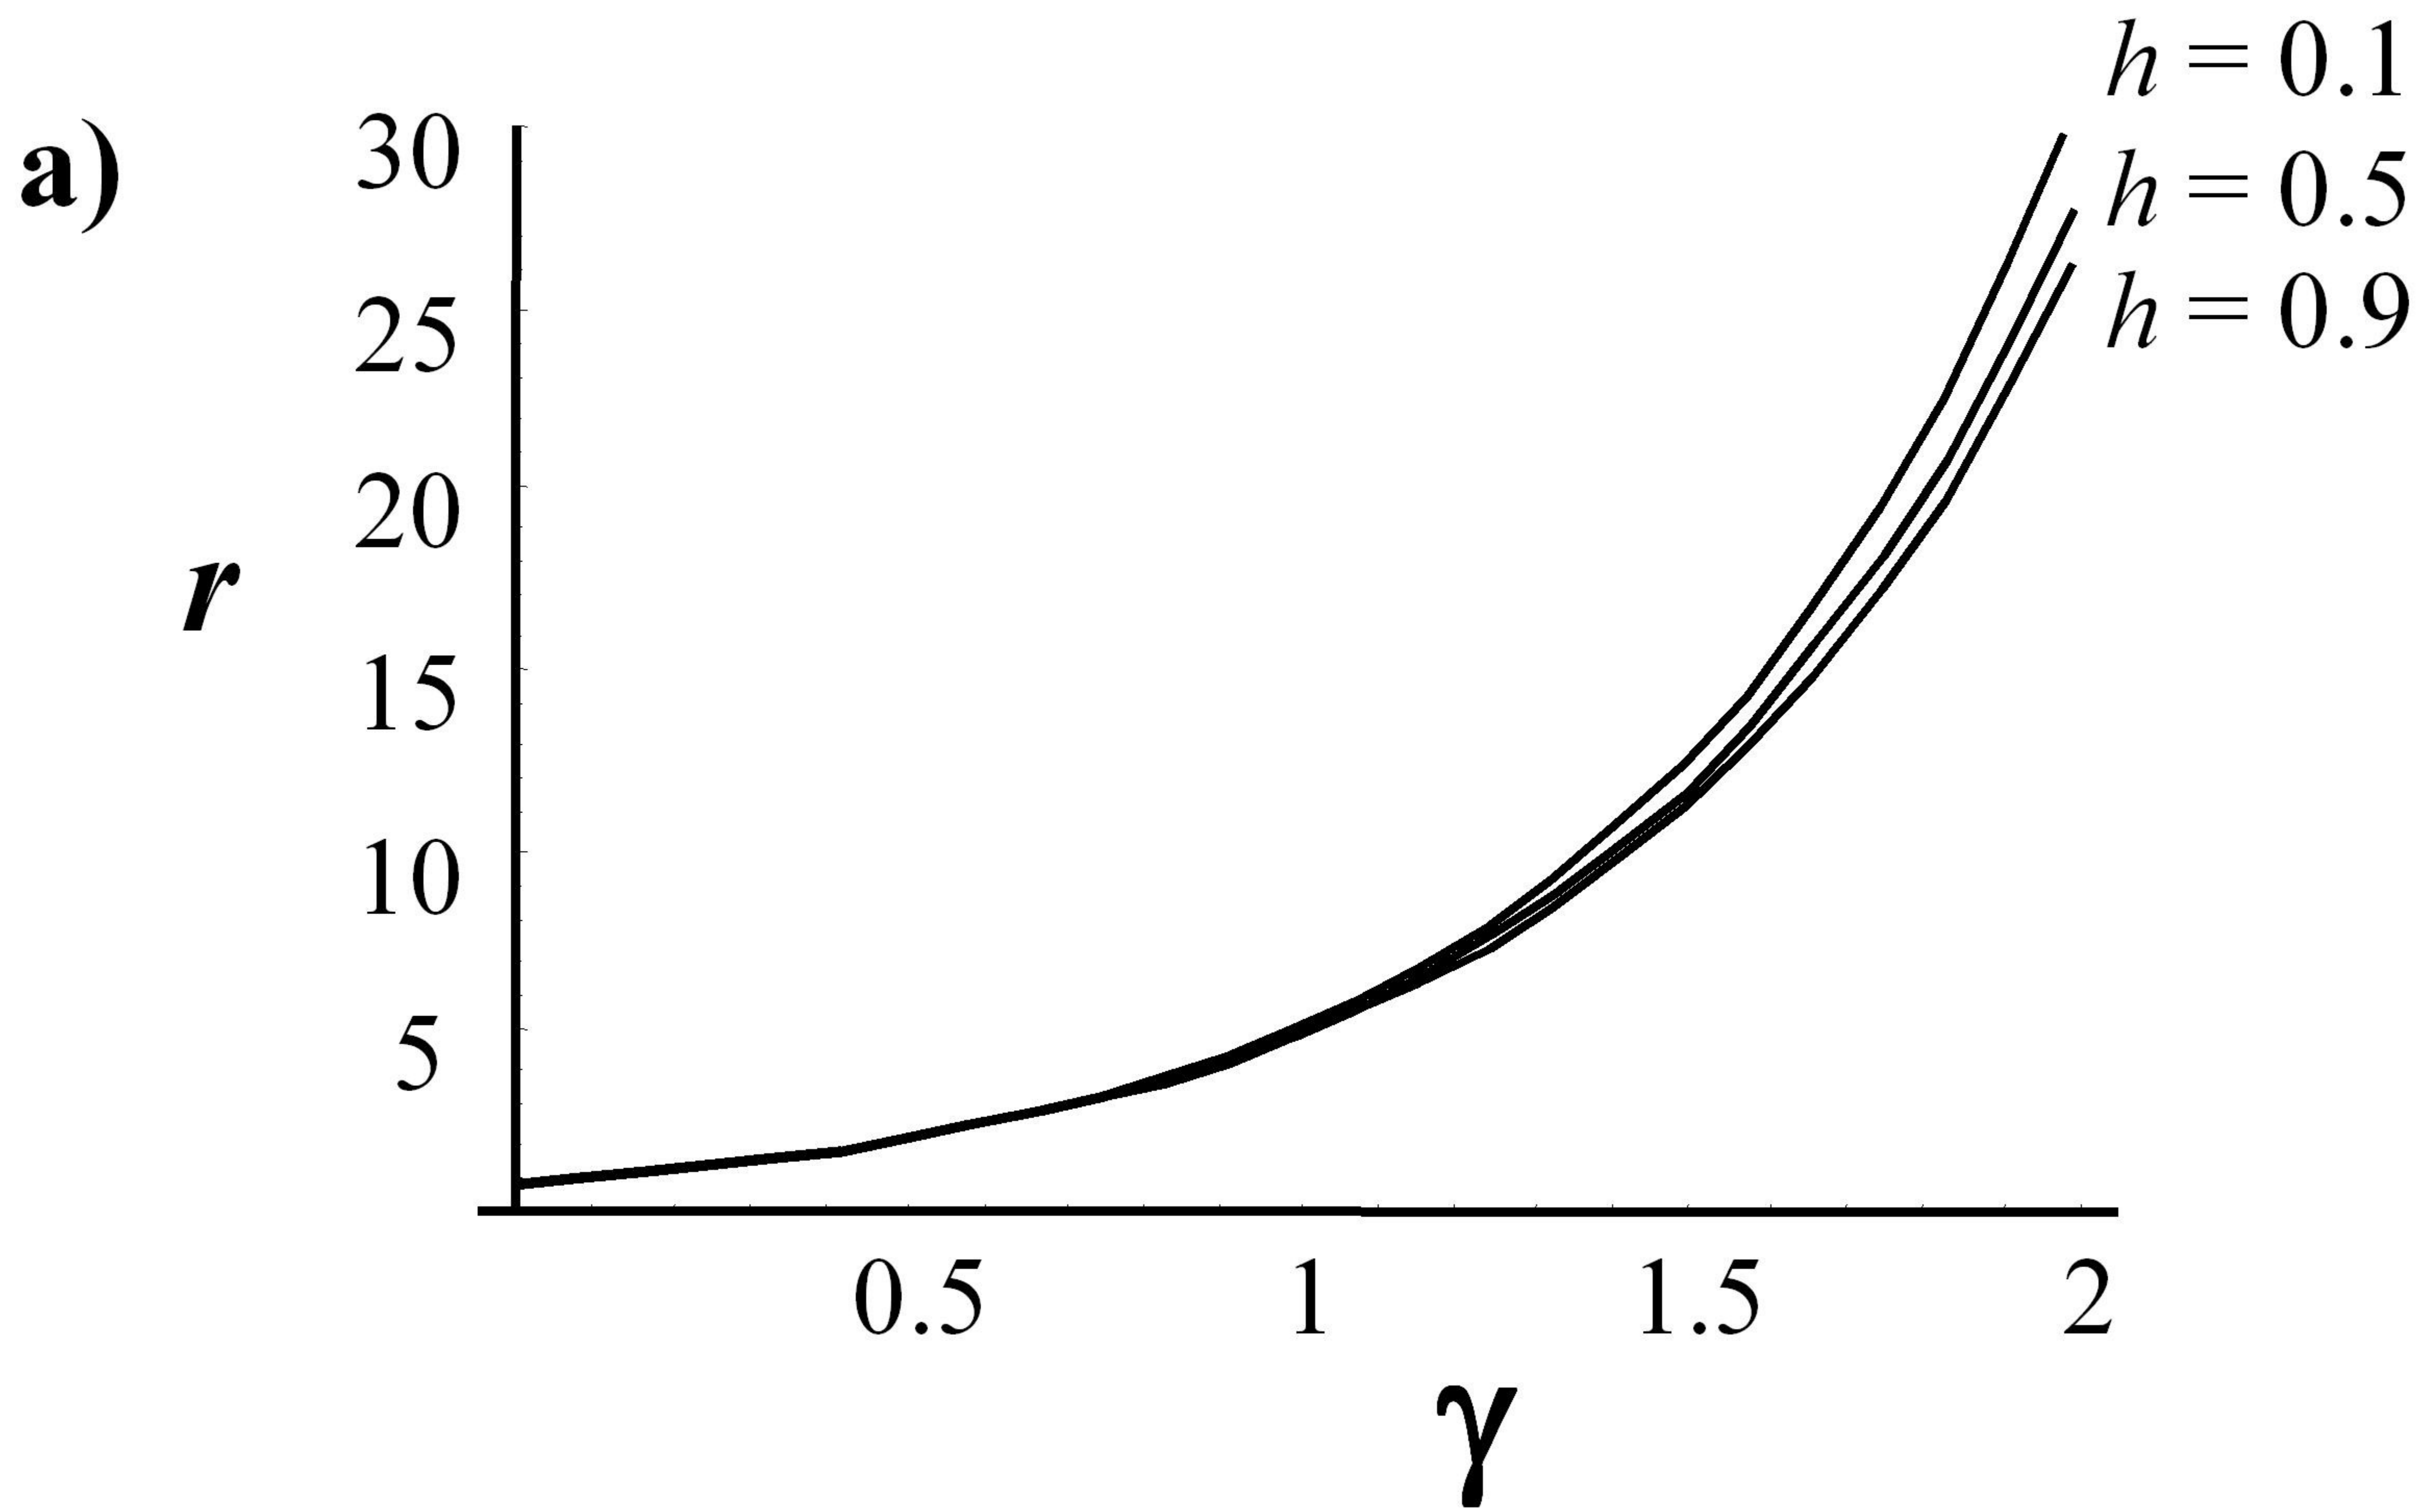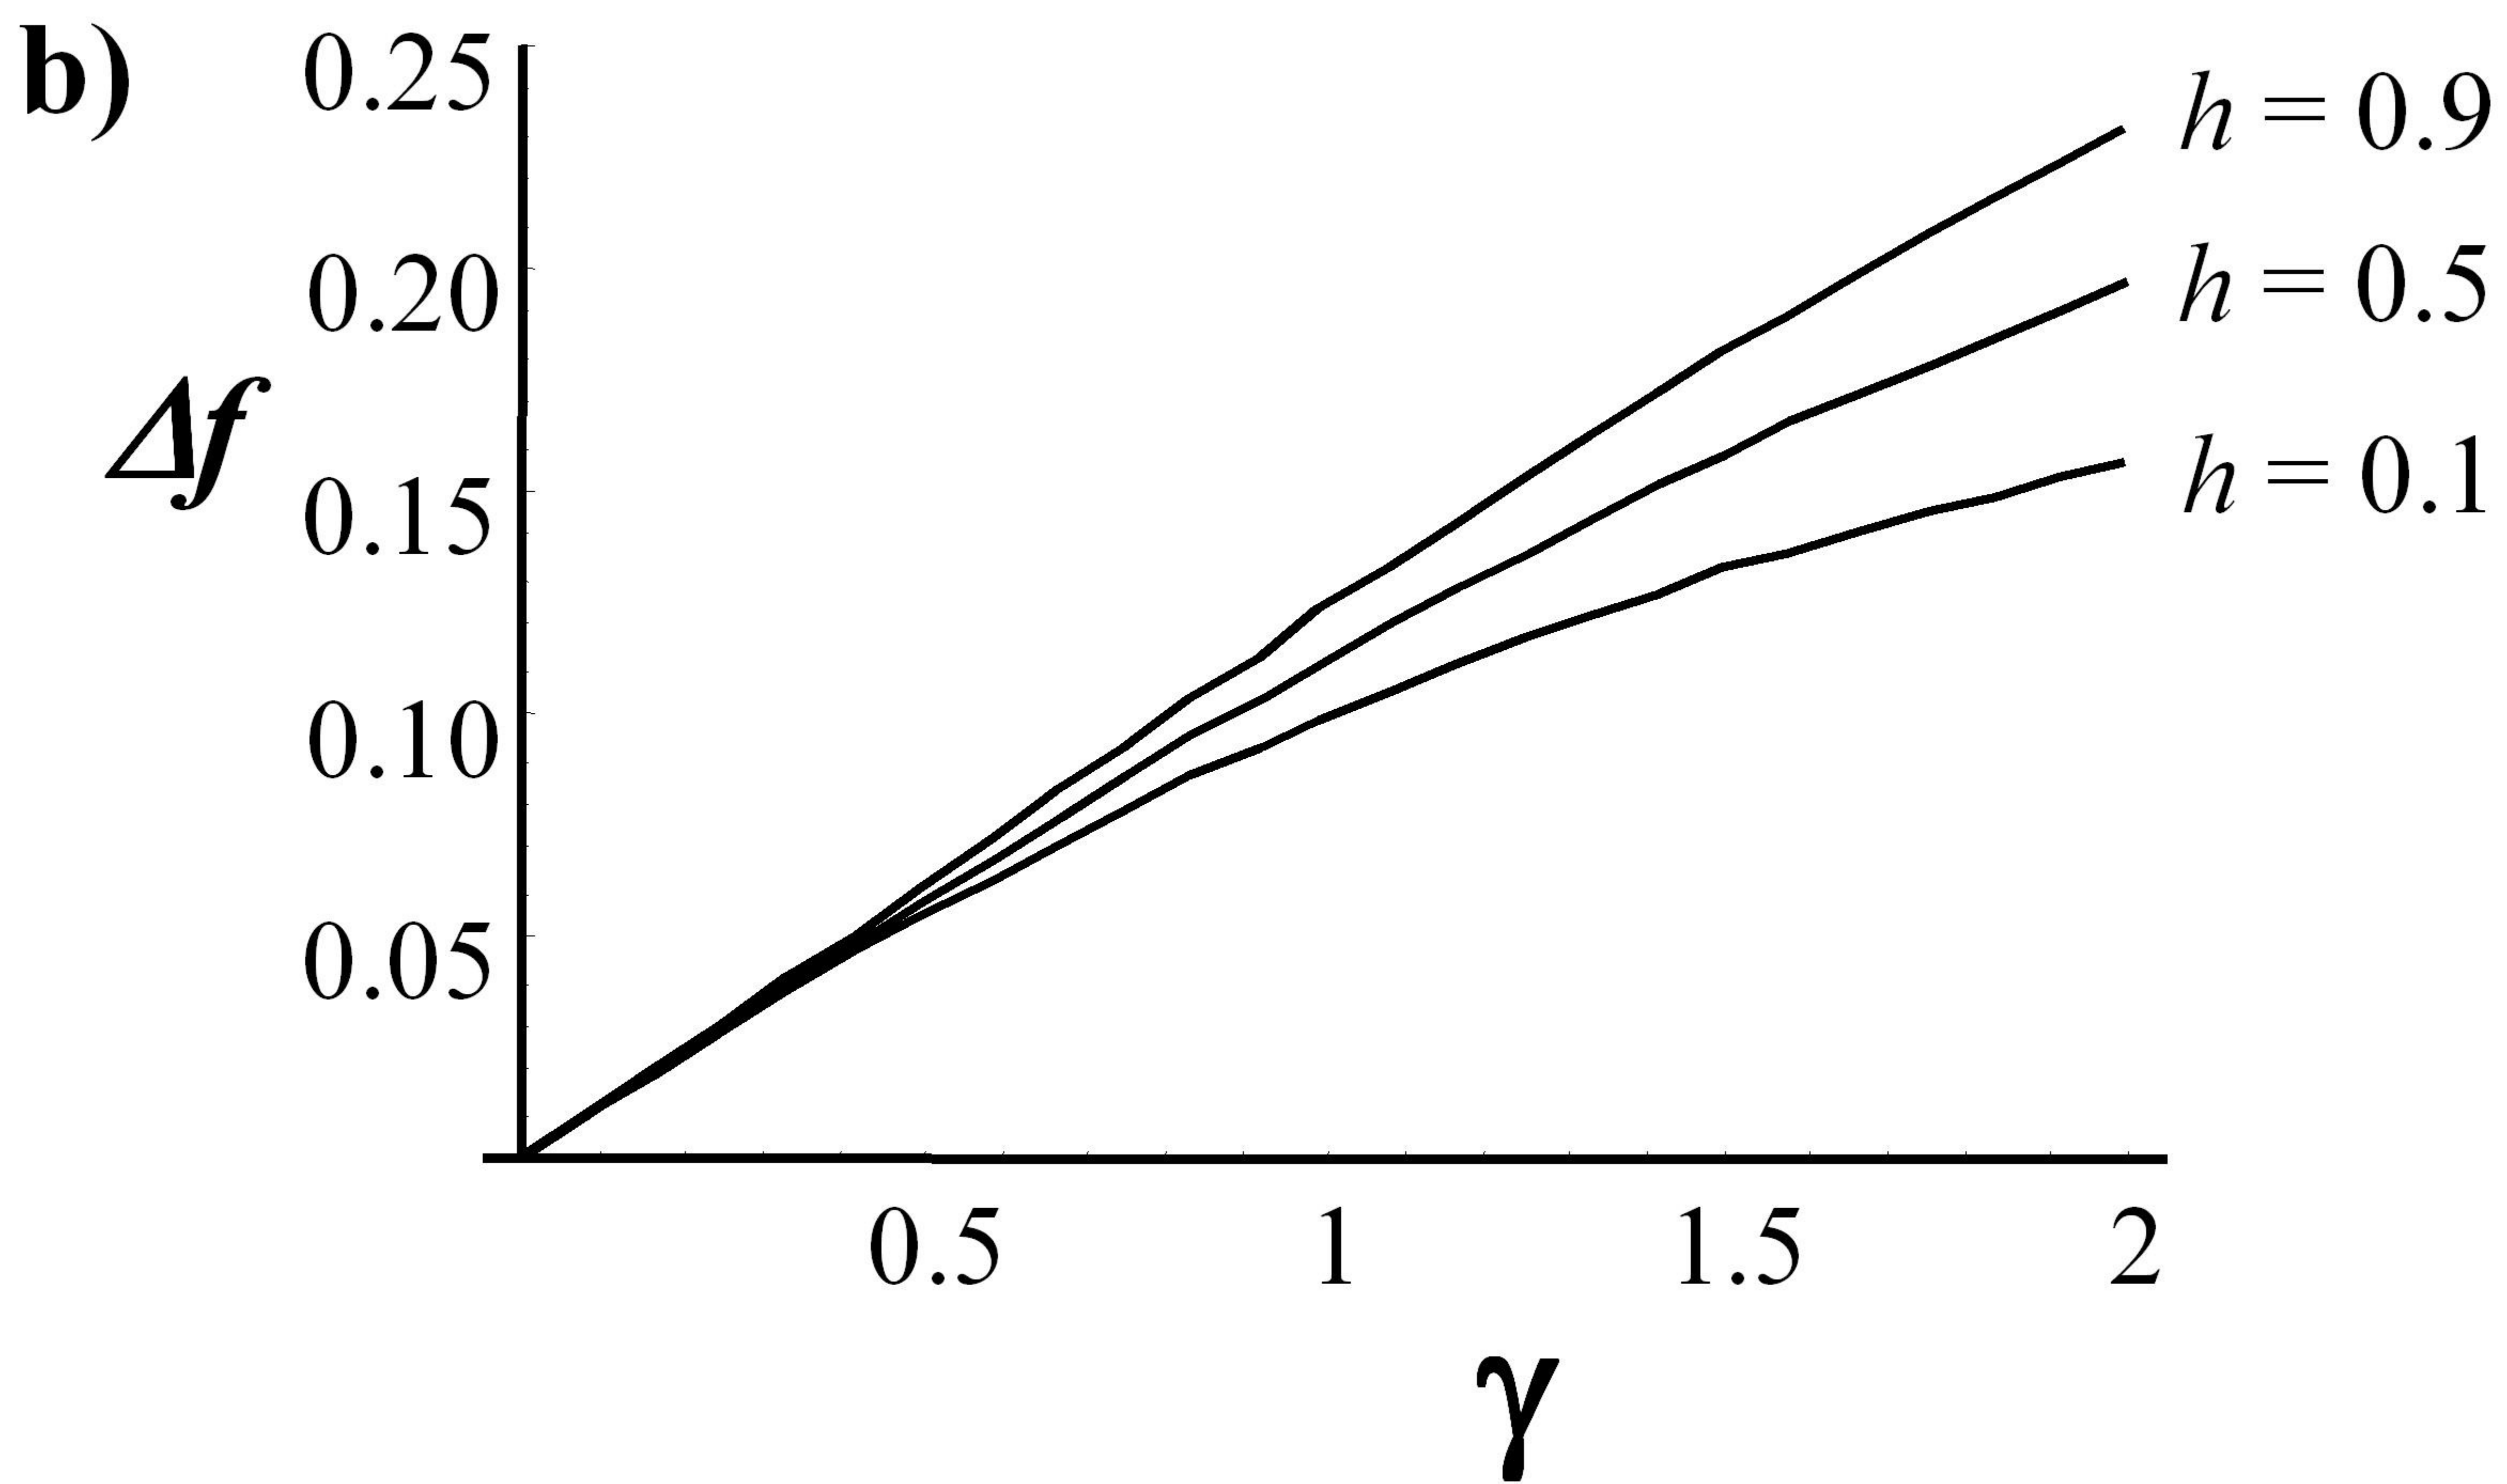

Supplement: pnas_0510638103_4.pdf [file pnas_0510638103_4.pdf]

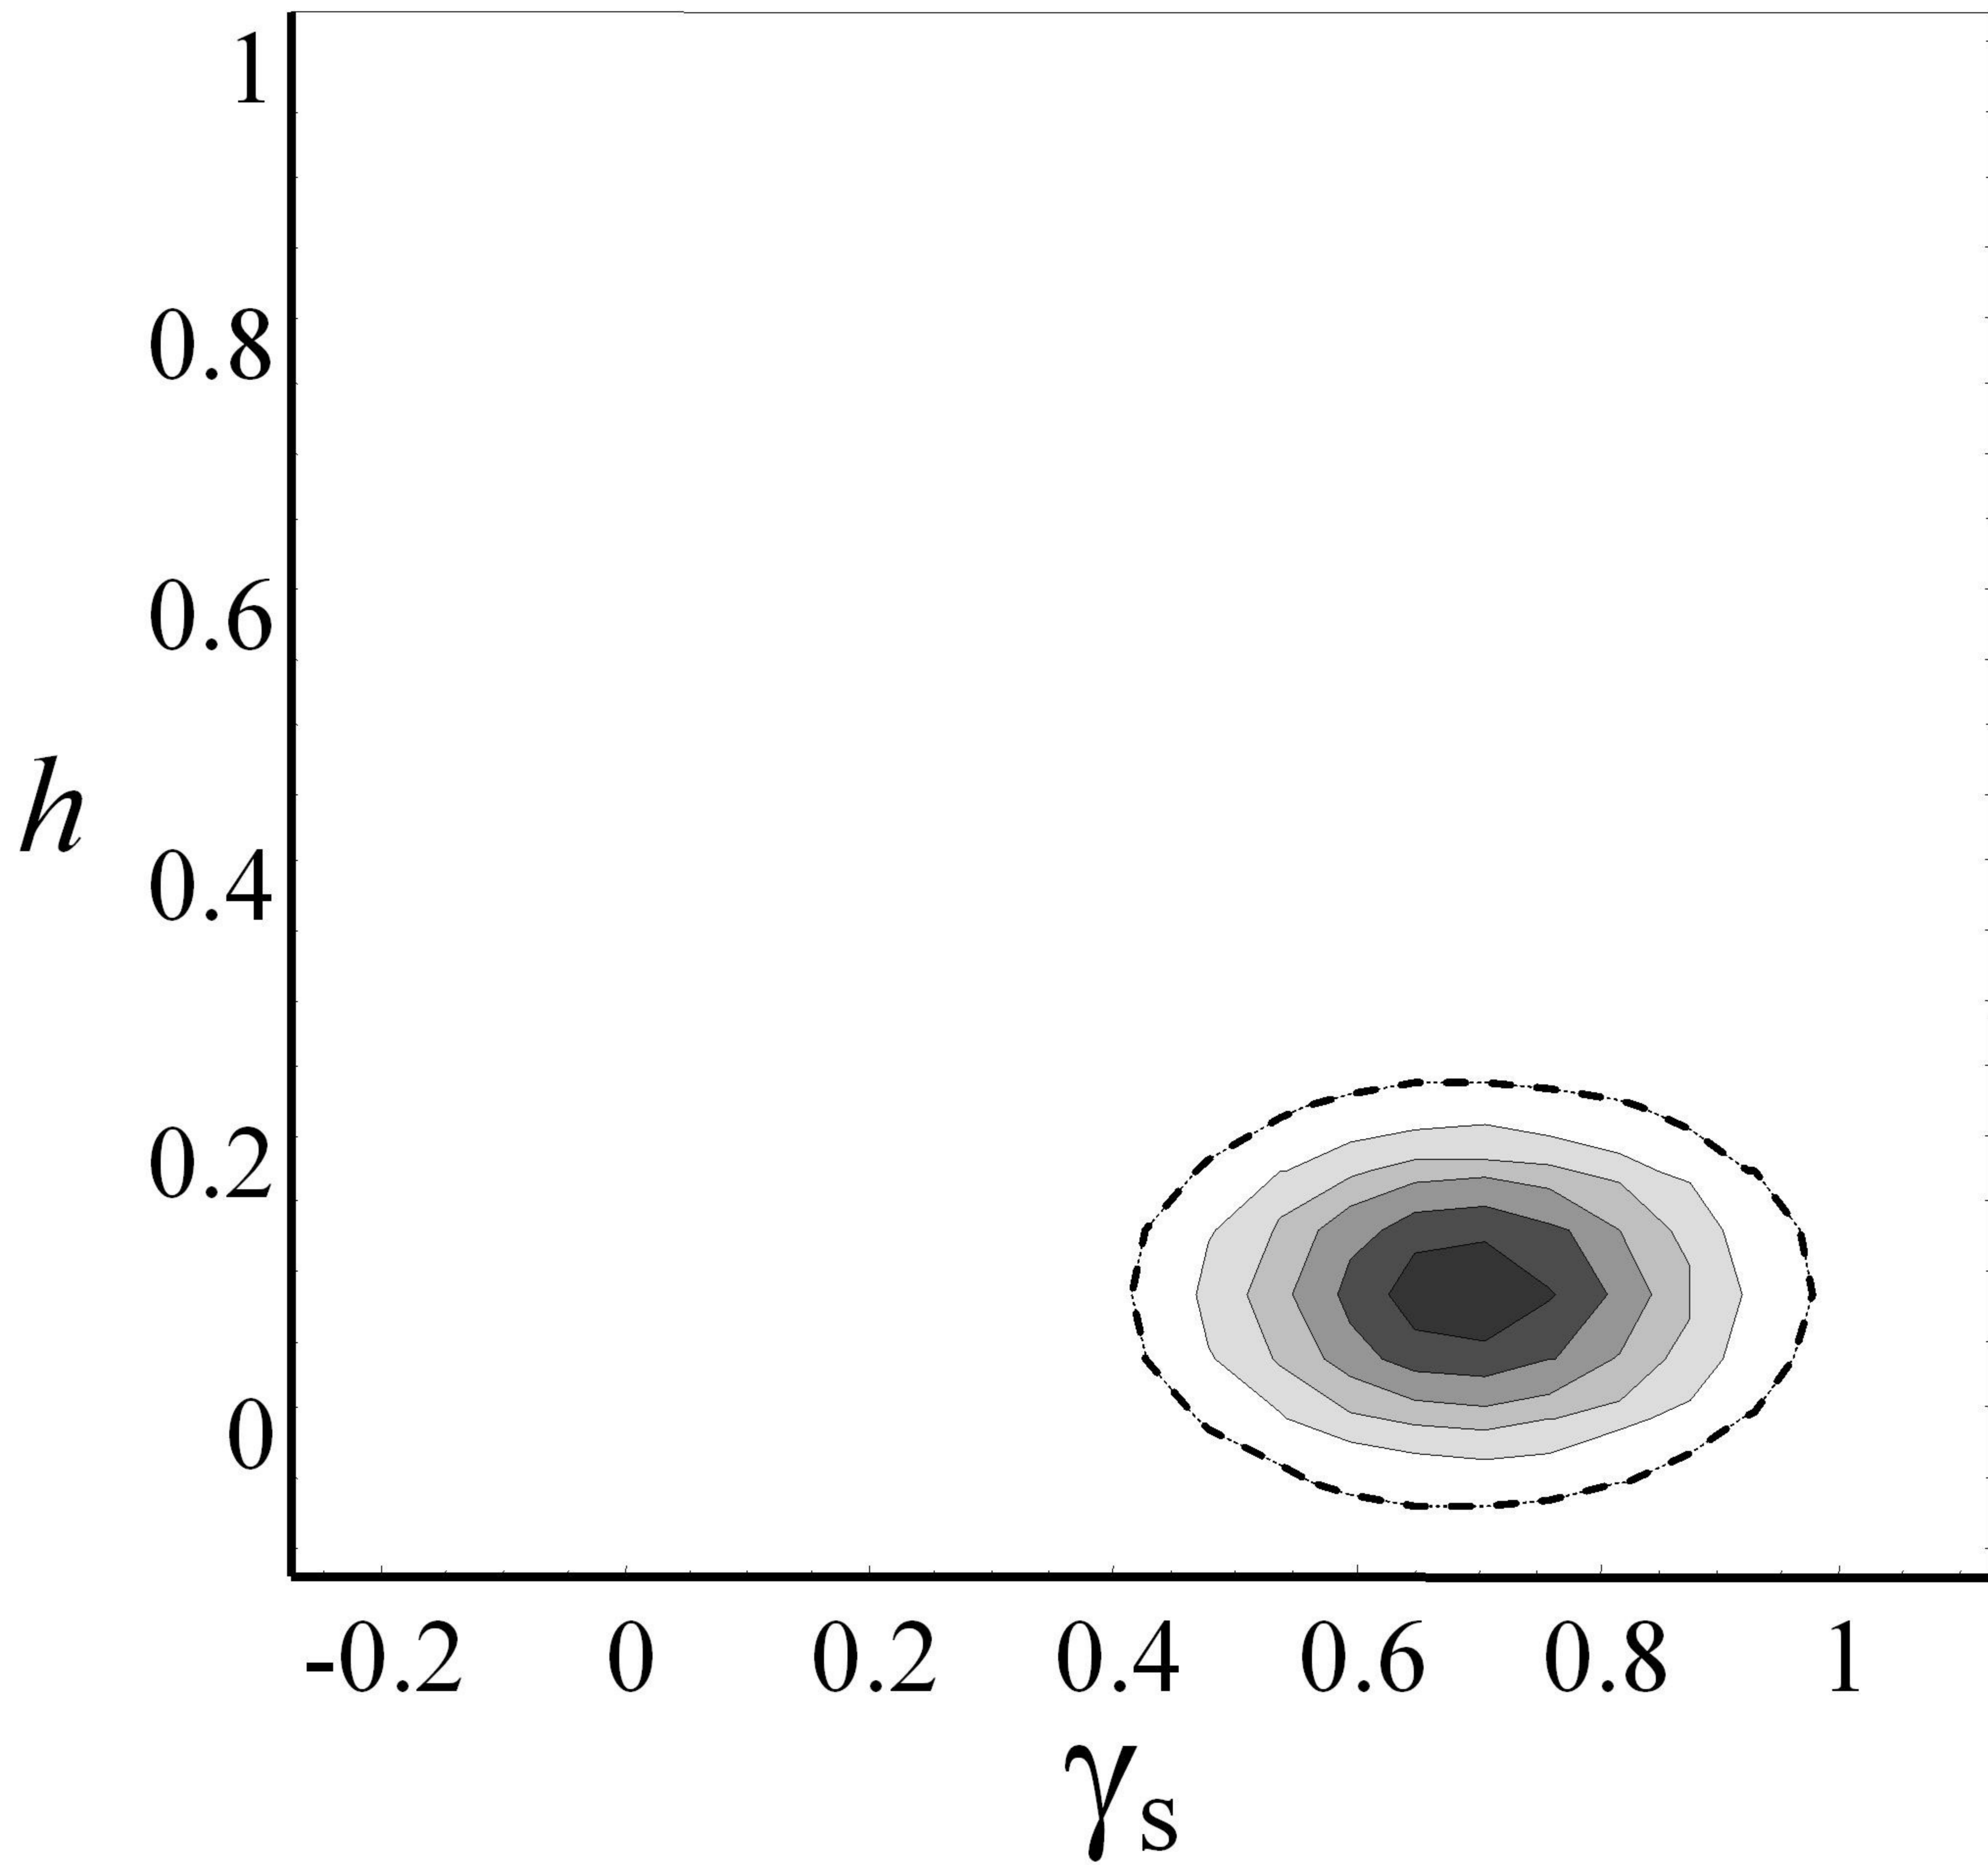

Supplement: pnas_0510638103_5.pdf [file pnas_0510638103_5.pdf]

a)

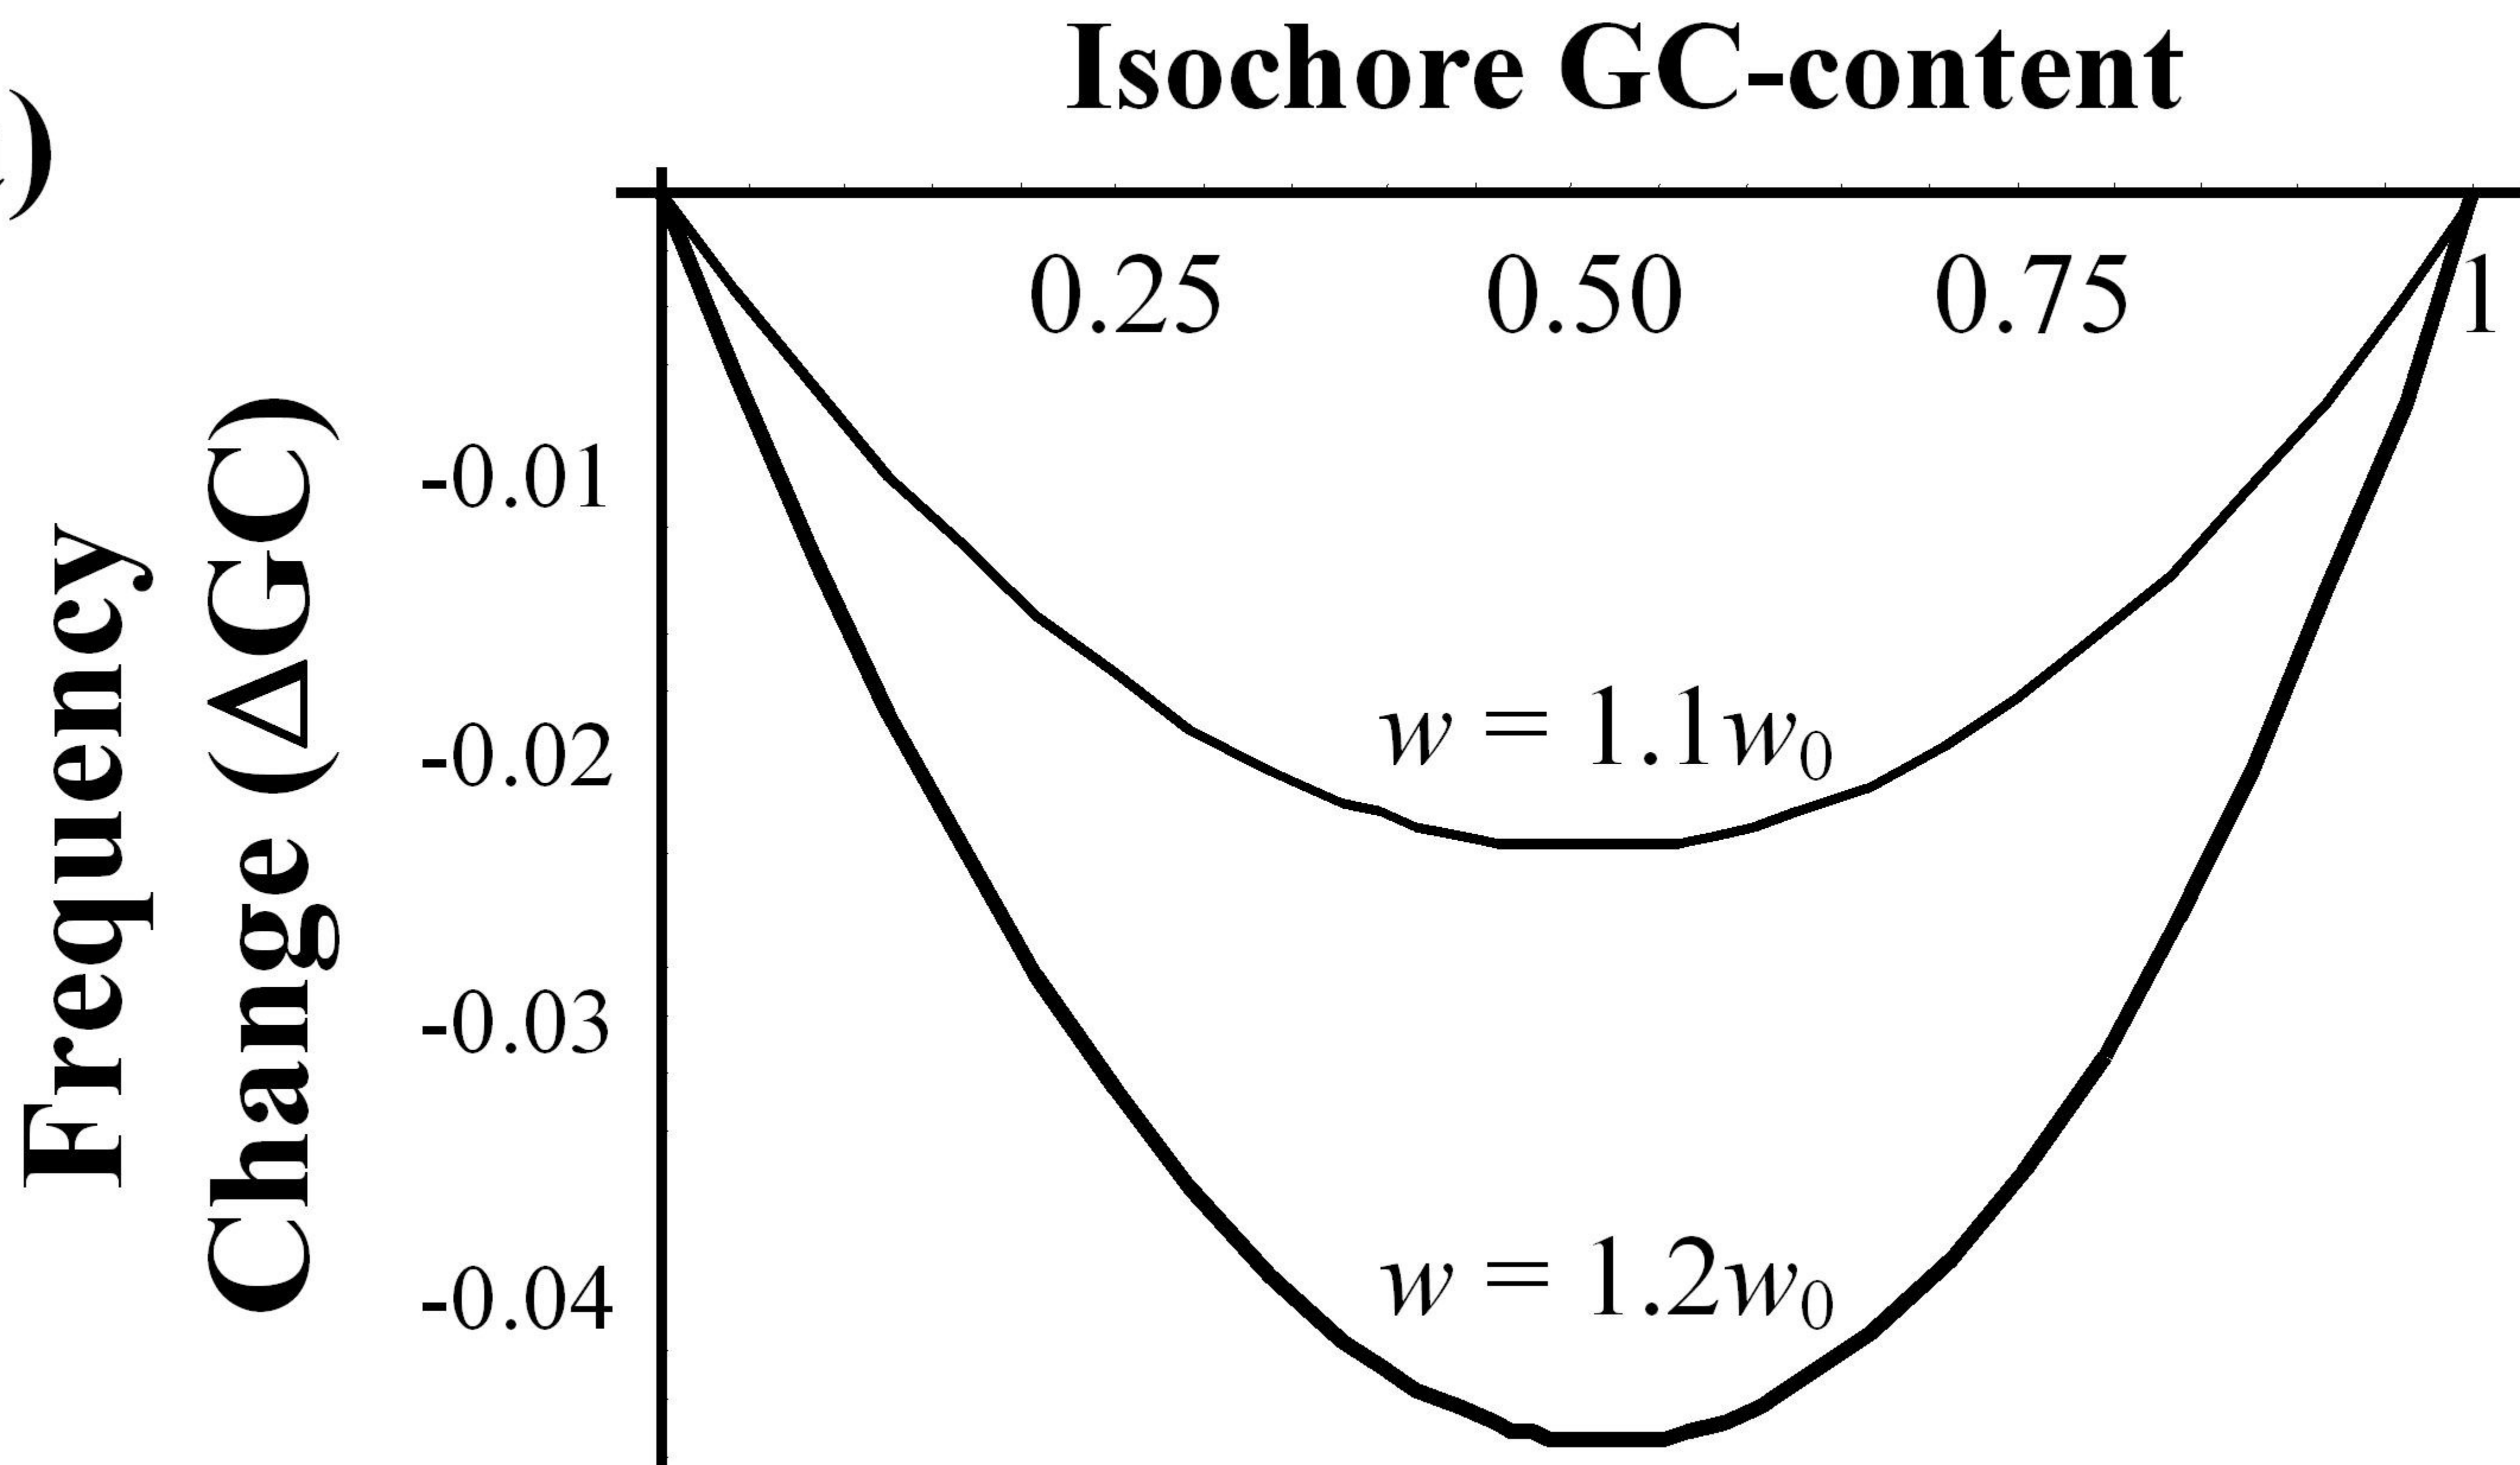

b)

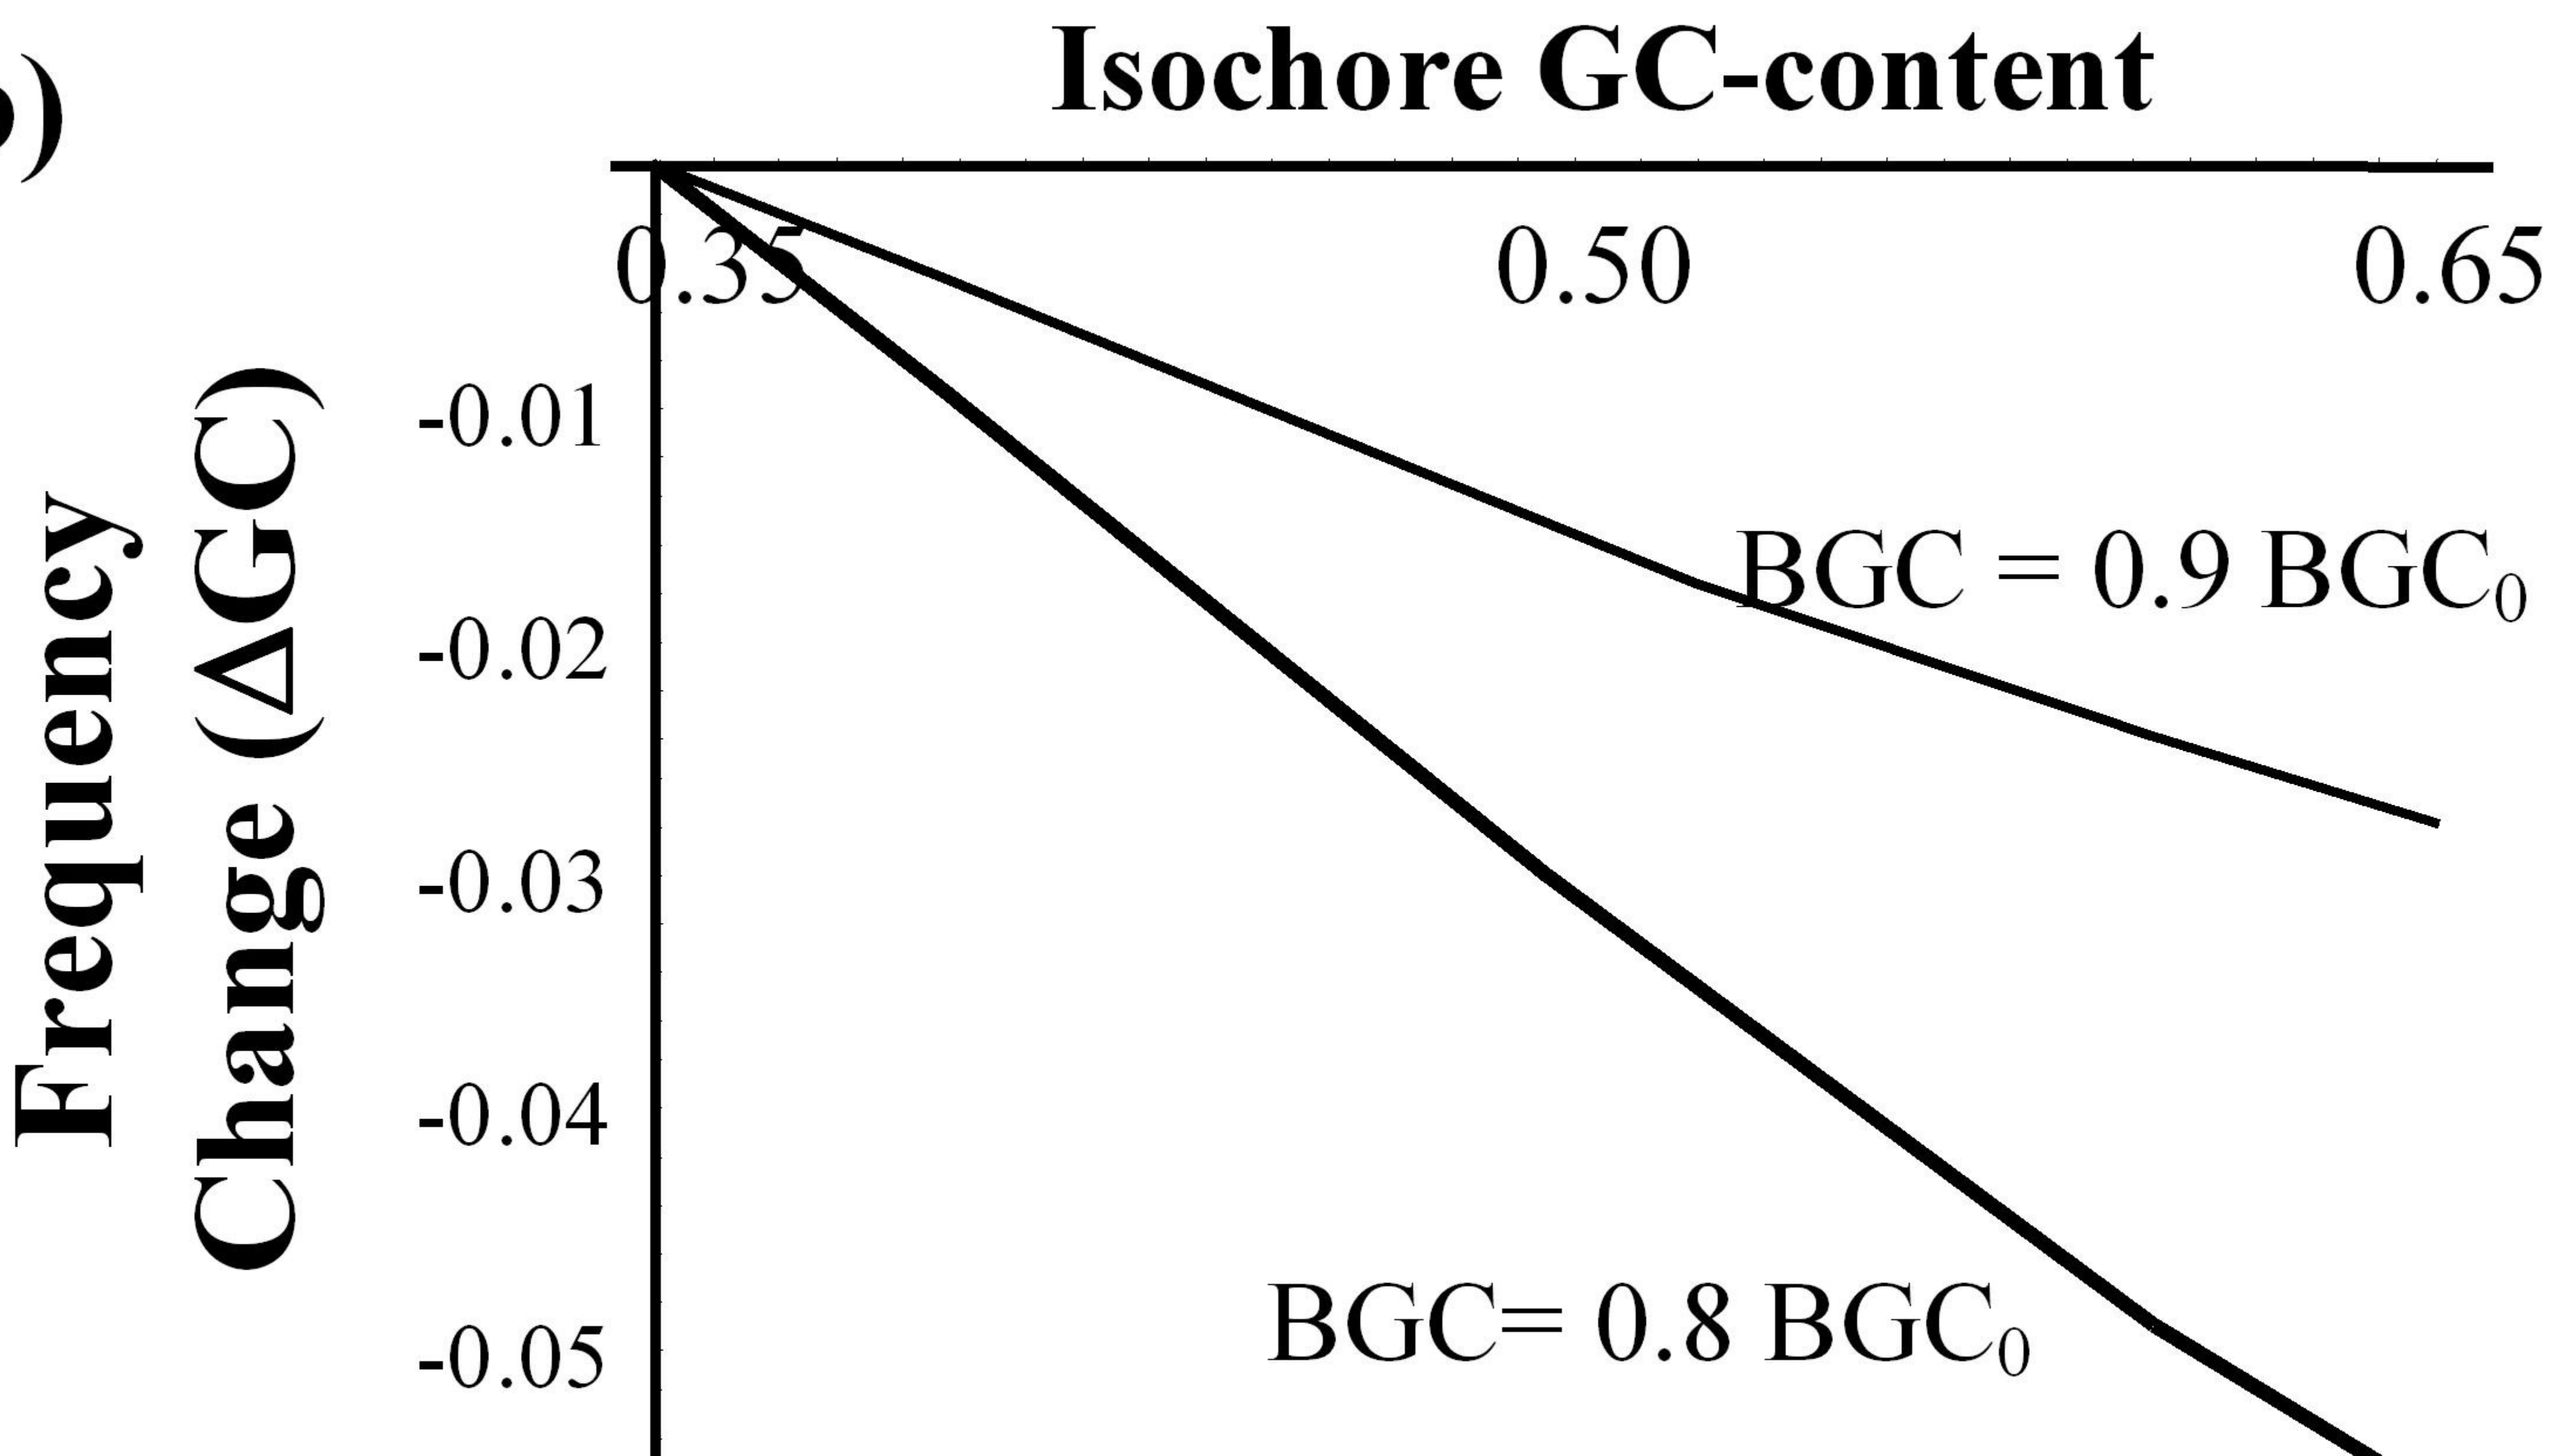

Supplement: pnas_0510638103_6.pdf [file pnas_0510638103_6.pdf]
